# Supplementary material
Source: PubMed Central journal article supplement (PMC3758404)
Supplement: NIHMS497578-supplement-1.pdf [file NIHMS497578-supplement-1.pdf]

## SUPPLEMENTARY INFORMATION

### Manuscript Title:

Multi-task connectivity reveals flexible hubs for adaptive task control

### Authors:

Michael W. Cole, Jeremy R. Reynolds, Jonathan D. Power, Grega Repovs, Alan Anticevic, Todd S. Braver

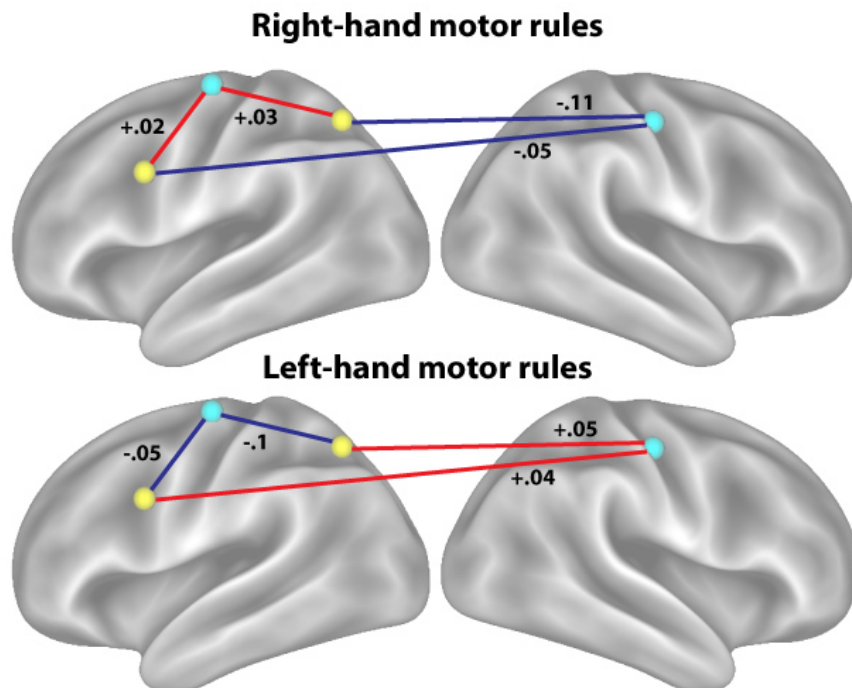

**Supplementary Figure 1** A simple test of the first flexible hub mechanism, for other analyses to verify and extend. The motor response rules provided an especially straightforward prediction of the flexible hub theory: FPN regions should shift their functional connectivity between left and right M1 depending on whether a left- or right-hand motor rule is being used. Functional connectivity between two FPN regions and two M1/S1 network regions were estimated (see **Fig. 3b**) during tasks involving right-hand ('RIGHT INDEX' or 'RIGHT MIDDLE') or left-hand ('LEFT INDEX' or 'LEFT MIDDLE') motor rules. We used an FPN region near the LPFC region identified by Cole et al.<sup>6</sup>, along with the FPN region with the highest mean activation across all 64 tasks (in PPC). The gPPI context-dependent beta estimates (averaged across participants) are shown in the figure. Both FPN regions were significantly more positively associated with left M1 during right-hand than left-hand motor rules ( $p < .02$ ), and this relationship reversed for right M1 ( $p < .02$ ). More formally demonstrating this effect, there was a significant 'motor region side' by 'response rule side' ANOVA interaction for the LPFC region ( $p = .009$ ), the PPC region ( $p = .0002$ ), and across all FPN regions with all left vs. all right M1/S1 regions ( $p = .009$ ). Note that a Supplementary Results document – including more details regarding this analysis – is available at <http://www.mwcole.net/cole-et-al-2013/>.

**Supplementary Table 1** 64-task gPPI GVC by network. Whole-brain mean GVC (averaged across all 264 regions) = 0.36. P-values were calculated using t-tests paired by subject.

\* =  $p < .05$ , FDR corrected for multiple comparisons

|                         | Mean          | T-value vs. whole-brain mean | P-value vs. whole-brain mean | T-value vs. FPN | P-value vs. FPN |
|-------------------------|---------------|------------------------------|------------------------------|-----------------|-----------------|
| <b>Motor network</b>    | 0.3737        | 1.5157                       | 0.1518                       | 3.3308          | 0.0049 *        |
| <b>CON</b>              | 0.3596        | -0.6944                      | 0.4988                       | 8.0670          | 0.0000 *        |
| <b>Auditory network</b> | 0.3758        | 1.3862                       | 0.1874                       | 2.9520          | 0.0105 *        |
| <b>DMN</b>              | 0.3677        | 1.5805                       | 0.1363                       | 8.6704          | 0.0000 *        |
| <b>Visual network</b>   | 0.3680        | 0.7806                       | 0.4480                       | 4.0828          | 0.0011 *        |
| <b>FPN</b>              | <b>0.4034</b> | 9.3673                       | 0.0000 *                     | –               | –               |
| <b>SAN</b>              | 0.3552        | -1.3628                      | 0.1945                       | 6.7744          | 0.0000 *        |
| <b>Subcort. network</b> | 0.3306        | -5.6355                      | 0.0001 *<br>(sig. lower)     | 11.4428         | 0.0000 *        |
| <b>VAN</b>              | 0.3788        | 2.0116                       | 0.0639                       | 2.9115          | 0.0114 *        |
| <b>DAN</b>              | 0.3760        | 1.7431                       | 0.1032                       | 2.8900          | 0.0119 *        |

**Supplementary Table 2** FPN gPPI GVC by rule dimension. P-values were calculated using t-tests paired by subject. In order to test for broad involvement across the three rule dimensions (designed to be functionally distinct to aid generalization of the findings), the flexible connectivity analyses were repeated for each rule dimension separately. This was possible because the task rules were sampled factorially in a 4 X 4 X 4 design, such that modeling a given rule across all observations would effectively control for the rules in the other dimensions (since they were equally balanced/distributed across observations). The gPPIs were calculated for each rule separately (rather than each task separately), with a separate linear model for each rule dimension. Variable connectivity was then computed as the standard deviation of each connection across each rule dimension's four rules. As expected, the FPN had the highest GVC for each rule dimension across all networks. FPN's GVC was significantly higher ( $p < .05$ , FDR corrected) than every network for every dimension except for: DAN, VAN, and motor/somatosensory networks for the sensory rules, and motor/somatosensory and auditory networks for the motor rules. Further, like for the 64-task analysis, the FPN's GVC was significantly higher than the average GVC over the entire brain for every rule dimension separately (listed in this table). These results strongly suggest that the FPN's connectivity shifts not only with a wide variety of networks but also across a variety of qualitatively distinct task rules (logical decision, sensory semantic, and motor response). Note that a Supplementary Results document – including more details regarding this analysis – is available at <http://www.mwcole.net/cole-et-al-2013/>.

\* =  $p < .05$ , FDR corrected for multiple comparisons

|                      | FPN GVC | Whole-brain GVC | P-value for diff. |
|----------------------|---------|-----------------|-------------------|
| <b>Logic rules</b>   | 0.096   | 0.086           | 3.6831e-06        |
| <b>Sensory rules</b> | 0.094   | 0.084           | 3.3886e-05        |
| <b>Motor rules</b>   | 0.095   | 0.085           | 6.5686e-06        |

**Supplementary Table 3** Pearson correlation-based 64-task GVC by network. Whole-brain mean GVC (averaged across all 264 regions) = 0.337. P-values were calculated using t-tests paired by subject. We calculated GVC based on partial Pearson correlations (i.e., Pearson correlations after regressing out mean task activation). Like with the gPPI GVC analysis, FPN was significantly higher ( $p < .05$ , FDR corrected) than all other networks. DMN showed mostly deactivation across the 64 tasks (**Supplementary Fig. 2**), suggesting the observed high GVC might be due to differential negative (activity-suppressing) functional connectivity across tasks. Note that a Supplementary Results document – including more details regarding this analysis – is available at <http://www.mwcole.net/cole-et-al-2013/>.

\* =  $p < .05$ , FDR corrected for multiple comparisons

|                         | Mean          | P-value vs. whole-brain mean | P-value vs. FPN |
|-------------------------|---------------|------------------------------|-----------------|
| <b>Motor network</b>    | 0.3377        | 0.6318                       | 0.0003 *        |
| <b>CON</b>              | 0.3346        | 0.0078 * (sig. lower)        | 0.0000 *        |
| <b>Auditory network</b> | 0.3356        | 0.1882                       | 0.0002 *        |
| <b>DMN</b>              | 0.3398        | 0.0005 *                     | 0.0003 *        |
| <b>Visual network</b>   | 0.3388        | 0.2063                       | 0.0177 *        |
| <b>FPN</b>              | <b>0.3431</b> | 0.0000 *                     | –               |
| <b>SAN</b>              | 0.3382        | 0.3243                       | 0.0002 *        |
| <b>Subcort. network</b> | 0.3304        | 0.0001 * (sig. lower)        | 0.0000 *        |
| <b>VAN</b>              | 0.3376        | 0.7253                       | 0.0008 *        |
| <b>DAN</b>              | 0.3381        | 0.4995                       | 0.0026 *        |

**Supplementary Table 4** Covariance-based 64-task GVC by network. Whole-brain mean GVC (averaged across all 264 regions) = 6.312. P-values were calculated using t-tests paired by subject. Note that a Supplementary Results document – including more details regarding this analysis – is available at <http://www.mwcole.net/cole-et-al-2013/>.

\* =  $p < .05$ , FDR corrected for multiple comparisons

|                         | Mean          | P-value vs. whole-brain mean | P-value vs. FPN |
|-------------------------|---------------|------------------------------|-----------------|
| <b>Motor network</b>    | 6.4068        | 0.5648                       | 0.0105 *        |
| <b>CON</b>              | 6.2394        | 0.5767                       | 0.0000 *        |
| <b>Auditory network</b> | 6.4589        | 0.4708                       | 0.0060 *        |
| <b>DMN</b>              | 6.3199        | 0.9059                       | 0.0000 *        |
| <b>Visual network</b>   | 6.6965        | 0.1492                       | 0.3974          |
| <b>FPN</b>              | <b>6.9792</b> | 0.0000 *                     | –               |
| <b>SAN</b>              | 6.2459        | 0.6084                       | 0.0000 *        |
| <b>Subcort. network</b> | 5.7982        | 0.0078 * (sig. lower)        | 0.0000 *        |
| <b>VAN</b>              | 6.4671        | 0.3719                       | 0.0132 *        |
| <b>DAN</b>              | 6.5224        | 0.2861                       | 0.0996          |

**Supplementary Table 5** Participation coefficient of variable connectivity (standard deviation of gPPI estimates across the 64 tasks) by network. Participation values were calculated for each region and averaged across regions in each network. P-values were calculated using t-tests paired by subject. The thresholds were standard density thresholds, in which the top percentage of connections are selected for analysis<sup>9</sup>.

\* = Lower than FPN's participation;  $p < .05$ , FDR corrected for multiple comparisons

|                         | <b>Variable connectivity thresholds</b> |              |               |               |               |
|-------------------------|-----------------------------------------|--------------|---------------|---------------|---------------|
|                         | <b>2%</b>                               | <b>4%</b>    | <b>6%</b>     | <b>8%</b>     | <b>10%</b>    |
| <b>Motor network</b>    | 0.6567*                                 | 0.7567*      | 0.7982*       | 0.8174*       | 0.8289*       |
| <b>CON</b>              | 0.6879*                                 | 0.7961*      | 0.8305*       | 0.8481*       | 0.8593*       |
| <b>Auditory network</b> | 0.7133*                                 | 0.798*       | 0.8369*       | 0.8525*       | 0.8645*       |
| <b>DMN</b>              | 0.6733*                                 | 0.7771*      | 0.82*         | 0.8397*       | 0.8499*       |
| <b>Visual network</b>   | 0.6994*                                 | 0.7982*      | 0.8333*       | 0.8489*       | 0.8627*       |
| <b>FPN</b>              | <b>0.76</b>                             | <b>0.832</b> | <b>0.8568</b> | <b>0.8712</b> | <b>0.8785</b> |
| <b>SAN</b>              | 0.6731*                                 | 0.7593*      | 0.7983*       | 0.8248*       | 0.8416*       |
| <b>Subcort. network</b> | 0.6636*                                 | 0.7843*      | 0.8256*       | 0.8429*       | 0.855*        |
| <b>VAN</b>              | 0.7173*                                 | 0.8194       | 0.8525        | 0.8659        | 0.8746        |
| <b>DAN</b>              | 0.6786*                                 | 0.798*       | 0.8357        | 0.8516        | 0.8656        |

**Supplementary Table 6** Pearson correlation-based participation coefficient of variable connectivity (standard deviation of correlation estimates across the 64 tasks) by network. Participation values were calculated for each region and averaged across regions in each network. P-values were calculated using t-tests paired by subject. Like for the gPPI analysis (see **Fig. 5a**), FPN had the highest variable connectivity participation coefficient across all thresholds (**Supplementary Table 6**). FPN's participation was significantly higher than many of the other networks for many of the thresholds, but not as many as for the gPPI analysis. Note that a Supplementary Results document – including more details regarding this analysis – is available at <http://www.mwcole.net/cole-etal-2013/>.

\* = Lower than FPN's participation;  $p < .05$ , FDR corrected for multiple comparisons

|                         | <b>Variable connectivity thresholds</b> |               |               |               |               |
|-------------------------|-----------------------------------------|---------------|---------------|---------------|---------------|
|                         | <b>2%</b>                               | <b>4%</b>     | <b>6%</b>     | <b>8%</b>     | <b>10%</b>    |
| <b>Motor network</b>    | 0.4398 *                                | 0.6179 *      | 0.7041 *      | 0.7568 *      | 0.79          |
| <b>CON</b>              | 0.3681 *                                | 0.5734 *      | 0.6859 *      | 0.7413        | 0.7732        |
| <b>Auditory network</b> | 0.3868 *                                | 0.6007 *      | 0.7006        | 0.7427        | 0.7855        |
| <b>DMN</b>              | 0.4896                                  | 0.6459        | 0.7189        | 0.7638        | 0.7902        |
| <b>Visual network</b>   | 0.4567                                  | 0.6243 *      | 0.7128        | 0.7609        | 0.7892        |
| <b>FPN</b>              | <b>0.5343</b>                           | <b>0.6941</b> | <b>0.7554</b> | <b>0.7901</b> | <b>0.8078</b> |
| <b>SAN</b>              | 0.4412 *                                | 0.6064 *      | 0.696 *       | 0.7405 *      | 0.7724 *      |
| <b>Subcort. network</b> | 0.2547 *                                | 0.4827 *      | 0.6179 *      | 0.6905 *      | 0.7361 *      |
| <b>VAN</b>              | 0.4296                                  | 0.6348        | 0.7111        | 0.758         | 0.7903        |
| <b>DAN</b>              | 0.4606                                  | 0.6303 *      | 0.7265        | 0.7609        | 0.7929        |

**Supplementary Table 7** Covariance-based participation coefficient of variable connectivity (standard deviation of covariance estimates across the 64 tasks) by network. Participation values were calculated for each region and averaged across regions in each network. P-values were calculated using t-tests paired by subject. Note that a Supplementary Results document – including more details regarding this analysis – is available at <http://www.mwcole.net/cole-et-al-2013/>.

\* = Lower than FPN's participation;  $p < .05$ , FDR corrected for multiple comparisons

|                         | Variable connectivity thresholds |               |              |               |               |
|-------------------------|----------------------------------|---------------|--------------|---------------|---------------|
|                         | 2%                               | 4%            | 6%           | 8%            | 10%           |
| <b>Motor network</b>    | 0.3545 *                         | 0.4989 *      | 0.578 *      | 0.617 *       | 0.6602 *      |
| <b>CON</b>              | 0.2972 *                         | 0.4491 *      | 0.5416 *     | 0.621 *       | 0.6771 *      |
| <b>Auditory network</b> | 0.3405 *                         | 0.4998        | 0.5921 *     | 0.6475 *      | 0.6989 *      |
| <b>DMN</b>              | 0.3471 *                         | 0.492 *       | 0.5816 *     | 0.6392 *      | 0.6773 *      |
| <b>Visual network</b>   | 0.3965 *                         | 0.5364 *      | 0.6315 *     | 0.6832 *      | 0.7204 *      |
| <b>FPN</b>              | <b>0.4745</b>                    | <b>0.6236</b> | <b>0.712</b> | <b>0.7517</b> | <b>0.7806</b> |
| <b>SAN</b>              | 0.3717 *                         | 0.4796 *      | 0.5749 *     | 0.6222 *      | 0.6618 *      |
| <b>Subcort. network</b> | 0.185 *                          | 0.4104 *      | 0.4963 *     | 0.5936 *      | 0.6535 *      |
| <b>VAN</b>              | 0.3449 *                         | 0.5082 *      | 0.5895 *     | 0.6807 *      | 0.7456        |
| <b>DAN</b>              | 0.3634 *                         | 0.5345 *      | 0.6023 *     | 0.6547 *      | 0.6884 *      |

**Supplementary Table 8** FPN regions with significantly ( $P < .05$ , FDR corrected) greater gPPI variable connectivity than every network's individual global/mean variable connectivity. P-values were calculated using t-tests paired by subject.

| Anatomy          | Area  | X coord. | Y coord. | Z coord. | Mean t-stat | Mean p-value |
|------------------|-------|----------|----------|----------|-------------|--------------|
| R. dorsal LPFC   | 9     | 45       | 19       | 30       | 3.6992      | 0.0057       |
| L. dorsal LPFC   | 6/9   | -40      | 2        | 33       | 3.5023      | 0.0081       |
| L. dorsal LPFC   | 9     | -45      | 7        | 24       | 3.2075      | 0.0139       |
| R. PPC           | 40    | 46       | -45      | 44       | 4.6341      | 0.0007       |
| R. PPC           | 40    | 41       | -55      | 45       | 4.9793      | 0.0003       |
| R. PPC           | 19/39 | 35       | -66      | 38       | 3.6295      | 0.0068       |
| L. anterior LPFC | 10    | -33      | 49       | 9        | 3.2475      | 0.0103       |
| L. anterior LPFC | 10    | -40      | 40       | 2        | 3.2370      | 0.0092       |
| R. anterior LPFC | 10    | 41       | 43       | 4        | 4.5724      | 0.0008       |

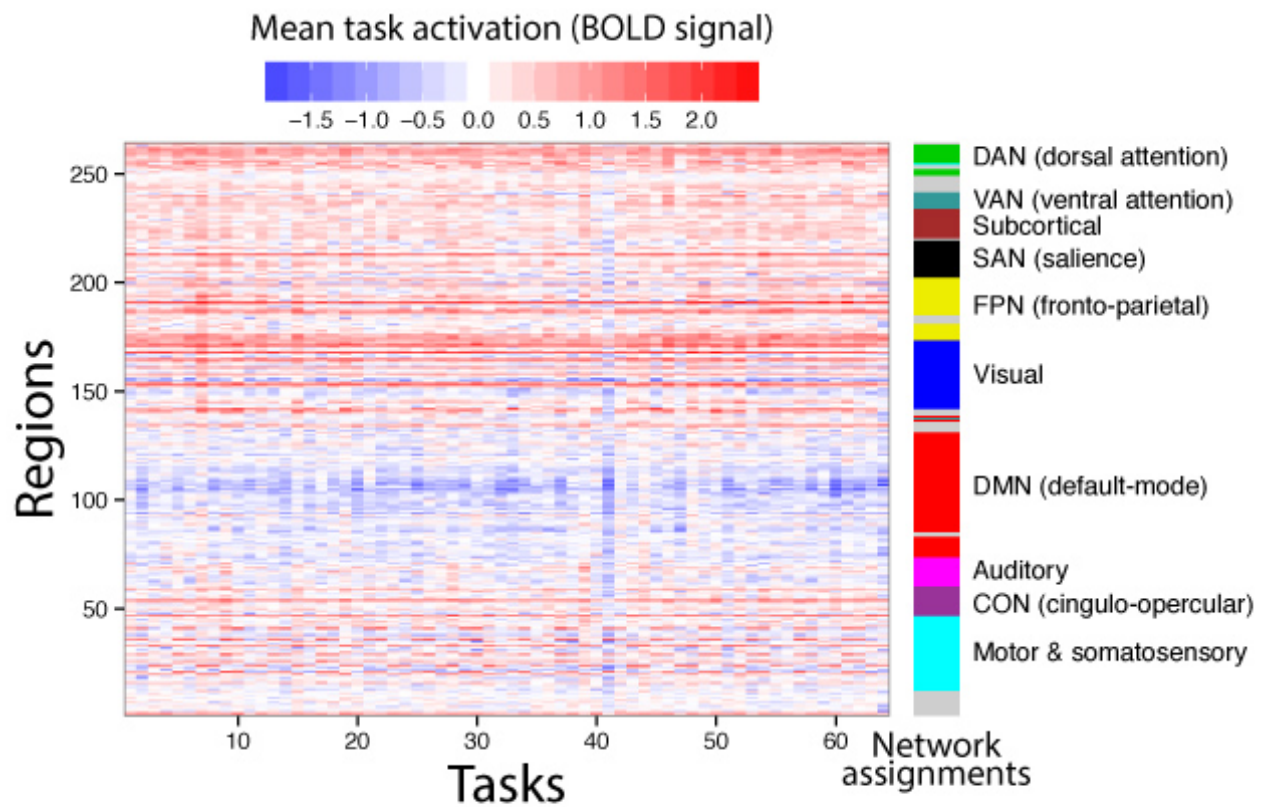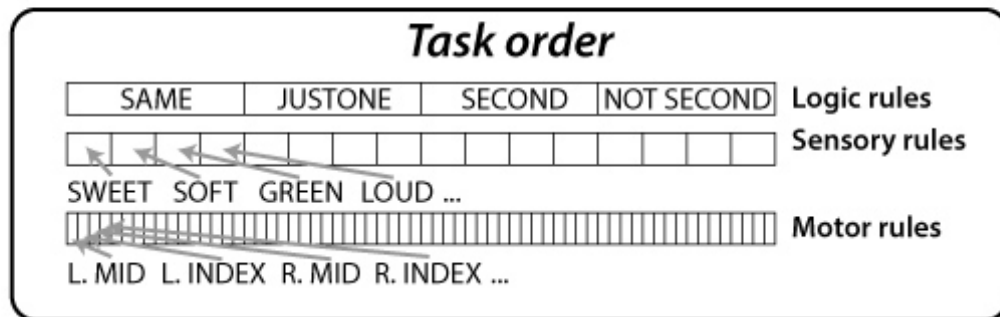

Supplementary Figure 2 Mean BOLD activity for all 264 regions across all 64 tasks.

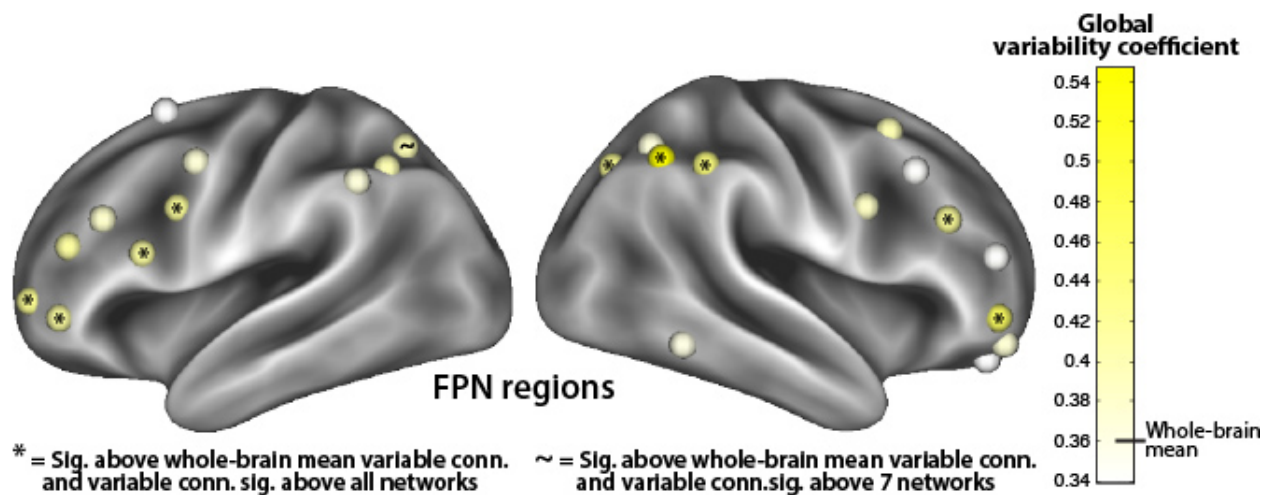

**Supplementary Figure 3** Individual FPN region effects, highlighting regions that have GVC significantly above the whole-brain mean variable connectivity ( $p < .05$ , FDR corrected). These regions (except for one marked ~) also had significantly higher variable connectivity with each network than each of those network's GVC (like FPN as a whole in **Fig. 5b**). The single FPN region on the medial wall (not shown) had the lowest GVC of the FPN regions (.34).

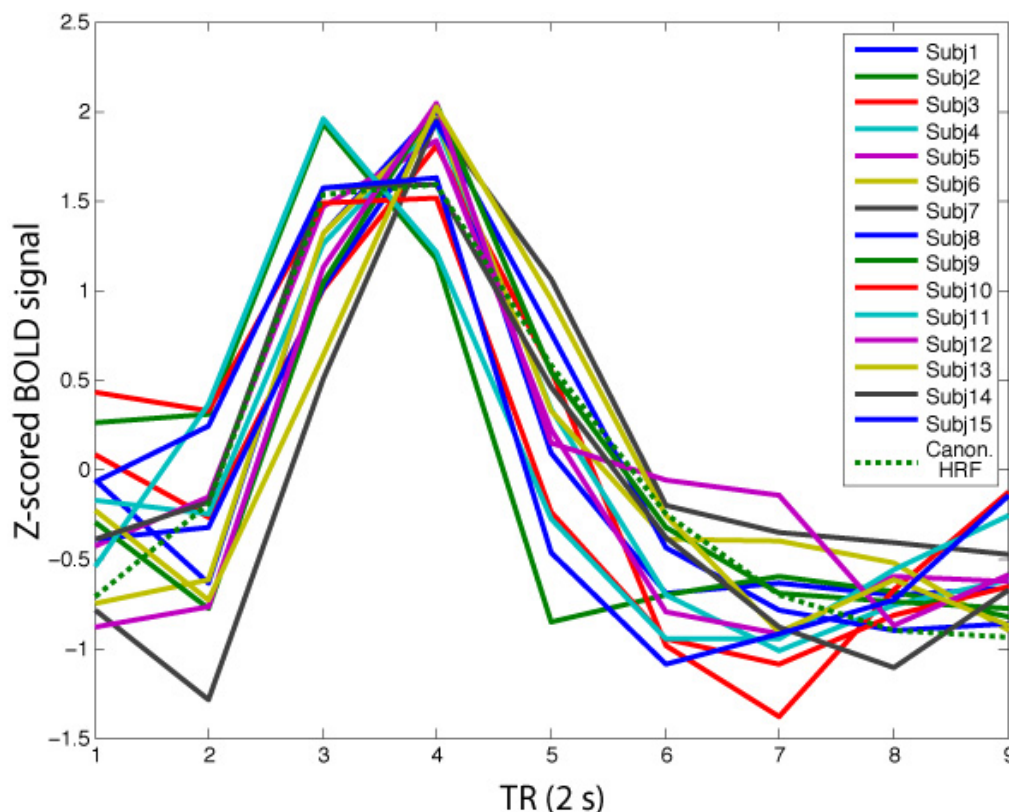

**Supplementary Figure 4** Empirically estimated hemodynamic response functions (HRFs) for each participant, along with SPM's canonical HRF. Each empirical HRF was based on hundreds of visual and motor events (480 visual events, 360 motor events) per subject. R-squared values between the SPM canonical HRF and each subject's empirical HRF (in same order as figure): .84, .58, .69, .88, .90, .92, .64, .93, .88, .66, .71, .84, .79, .97, and .65.

**Supplementary Table 9** Location and graph theoretical data for all regions, averaged across participants. Participation coefficient is reported as the mean across all five thresholds. Results from gPPI, Pearson correlation, and covariance analyses are included. Network assignment numbers: 1=somato-motor, 3=CON, 4=auditory, 5=DMN, 7=visual, 8=FPN, 9=SAN, 10=subcortical, 11=VAN, 12=DAN, -1=uncertain. Pearson correlations among the different functional connectivity measures (i.e., across columns of the table): GVC (gPPI & corr)=.74, participation (gPPI & corr)=.60, GVC (gPPI & cov)=.98, participation (gPPI & cov)=.81, GVC (corr & cov)=.78, participation (corr & cov)=.76.

|    | Net | Tal. Coords | GVC (gPPI) | Participation (gPPI) | GVC (corr) | Participation (corr) | GVC (cov) | Participation (cov) |
|----|-----|-------------|------------|----------------------|------------|----------------------|-----------|---------------------|
| 1  | -1  | -23,-96,-15 | 0.370      | 0.841                | 0.343      | 0.733                | 6.195     | 0.642               |
| 2  | -1  | 26,-96,-15  | 0.345      | 0.717                | 0.344      | 0.797                | 6.168     | 0.621               |
| 3  | -1  | 23,27,-12   | 0.337      | 0.815                | 0.337      | 0.587                | 5.833     | 0.589               |
| 4  | -1  | -53,-45,-24 | 0.104      | 0.020                | 0.315      | 0.343                | 1.593     | 0.000               |
| 5  | -1  | 8,36,-18    | 0.241      | 0.613                | 0.332      | 0.652                | 4.129     | 0.324               |
| 6  | -1  | -20,-24,-18 | 0.276      | 0.738                | 0.322      | 0.391                | 4.591     | 0.296               |
| 7  | -1  | 17,-30,-15  | 0.454      | 0.868                | 0.310      | 0.245                | 6.889     | 0.649               |
| 8  | -1  | -35,-30,-24 | 0.187      | 0.364                | 0.322      | 0.367                | 3.090     | 0.000               |
| 9  | -1  | 62,-27,-15  | 0.228      | 0.547                | 0.321      | 0.400                | 3.737     | 0.208               |
| 10 | -1  | 50,-36,-24  | 0.114      | 0.083                | 0.311      | 0.289                | 1.763     | 0.000               |
| 11 | -1  | 53,-33,-14  | 0.260      | 0.696                | 0.319      | 0.441                | 4.115     | 0.078               |
| 12 | -1  | 32,33,-6    | 0.353      | 0.823                | 0.343      | 0.704                | 6.504     | 0.649               |
| 13 | 1   | -8,-54,57   | 0.385      | 0.814                | 0.342      | 0.733                | 6.991     | 0.642               |
| 14 | 1   | -14,-21,39  | 0.206      | 0.444                | 0.316      | 0.332                | 3.205     | 0.000               |
| 15 | 1   | -1,-18,46   | 0.397      | 0.843                | 0.343      | 0.743                | 7.334     | 0.731               |
| 16 | 1   | 8,-6,45     | 0.341      | 0.813                | 0.335      | 0.697                | 5.811     | 0.477               |
| 17 | 1   | -8,-24,63   | 0.283      | 0.737                | 0.329      | 0.621                | 4.720     | 0.300               |
| 18 | 1   | -8,-36,69   | 0.409      | 0.813                | 0.340      | 0.700                | 7.367     | 0.620               |
| 19 | 1   | 11,-36,72   | 0.462      | 0.867                | 0.340      | 0.690                | 8.145     | 0.739               |
| 20 | 1   | -52,-25,41  | 0.374      | 0.795                | 0.342      | 0.725                | 6.318     | 0.590               |
| 21 | 1   | 26,-21,69   | 0.493      | 0.828                | 0.348      | 0.758                | 8.859     | 0.699               |
| 22 | 1   | 8,-48,69    | 0.462      | 0.837                | 0.341      | 0.686                | 7.950     | 0.719               |
| 23 | 1   | -23,-33,69  | 0.404      | 0.851                | 0.341      | 0.723                | 6.956     | 0.589               |
| 24 | 1   | -39,-22,52  | 0.400      | 0.839                | 0.343      | 0.736                | 6.581     | 0.645               |
| 25 | 1   | 26,-42,57   | 0.349      | 0.809                | 0.334      | 0.582                | 6.058     | 0.480               |
| 26 | 1   | 47,-24,42   | 0.400      | 0.845                | 0.337      | 0.629                | 6.598     | 0.578               |
| 27 | 1   | -38,-30,66  | 0.127      | 0.147                | 0.334      | 0.598                | 2.045     | 0.000               |
| 28 | 1   | 18,-32,58   | 0.294      | 0.702                | 0.330      | 0.535                | 4.981     | 0.278               |
| 29 | 1   | 41,-12,57   | 0.390      | 0.811                | 0.339      | 0.655                | 6.616     | 0.699               |
| 30 | 1   | -29,-45,57  | 0.374      | 0.845                | 0.339      | 0.666                | 6.715     | 0.668               |
| 31 | 1   | 8,-21,72    | 0.501      | 0.864                | 0.343      | 0.732                | 8.848     | 0.785               |
| 32 | 1   | 20,-45,66   | 0.455      | 0.865                | 0.336      | 0.647                | 7.624     | 0.629               |



|    |   |            |       |       |       |       |       |       |
|----|---|------------|-------|-------|-------|-------|-------|-------|
| 33 | 1 | -44,-34,44 | 0.383 | 0.845 | 0.345 | 0.701 | 6.324 | 0.618 |
| 34 | 1 | -21,-34,58 | 0.284 | 0.707 | 0.328 | 0.507 | 4.898 | 0.266 |
| 35 | 1 | -14,-21,72 | 0.379 | 0.761 | 0.337 | 0.646 | 6.596 | 0.441 |
| 36 | 1 | 39,-24,54  | 0.466 | 0.860 | 0.347 | 0.800 | 7.904 | 0.755 |
| 37 | 1 | -38,-18,66 | 0.116 | 0.175 | 0.330 | 0.533 | 1.820 | 0.000 |
| 38 | 1 | -17,-48,69 | 0.443 | 0.822 | 0.340 | 0.662 | 7.676 | 0.570 |
| 39 | 1 | 1,-31,58   | 0.369 | 0.821 | 0.337 | 0.689 | 6.269 | 0.611 |
| 40 | 1 | 2,-21,57   | 0.377 | 0.818 | 0.340 | 0.731 | 6.625 | 0.596 |
| 41 | 1 | 35,-21,45  | 0.418 | 0.860 | 0.339 | 0.685 | 7.068 | 0.724 |
| 42 | 1 | -48,-14,34 | 0.384 | 0.836 | 0.339 | 0.723 | 6.506 | 0.616 |
| 43 | 1 | 34,-13,16  | 0.323 | 0.760 | 0.331 | 0.571 | 5.455 | 0.400 |
| 44 | 1 | 48,-10,34  | 0.424 | 0.851 | 0.339 | 0.680 | 7.067 | 0.642 |
| 45 | 1 | -51,-13,24 | 0.396 | 0.842 | 0.335 | 0.633 | 6.456 | 0.606 |
| 46 | 1 | 62,-12,27  | 0.385 | 0.809 | 0.339 | 0.700 | 6.509 | 0.606 |
| 47 | 3 | -4,-2,53   | 0.318 | 0.801 | 0.331 | 0.550 | 5.205 | 0.337 |
| 48 | 3 | 51,-31,34  | 0.417 | 0.860 | 0.338 | 0.692 | 7.011 | 0.579 |
| 49 | 3 | 17,-12,63  | 0.320 | 0.777 | 0.332 | 0.596 | 5.406 | 0.355 |
| 50 | 3 | -17,-9,69  | 0.368 | 0.783 | 0.336 | 0.619 | 6.306 | 0.433 |
| 51 | 3 | -11,-6,42  | 0.228 | 0.625 | 0.318 | 0.292 | 3.540 | 0.050 |
| 52 | 3 | 35,-3,0    | 0.349 | 0.829 | 0.331 | 0.648 | 6.216 | 0.464 |
| 53 | 3 | 11,-6,69   | 0.376 | 0.838 | 0.335 | 0.613 | 6.567 | 0.522 |
| 54 | 3 | 5,3,51     | 0.390 | 0.818 | 0.341 | 0.753 | 6.844 | 0.695 |
| 55 | 3 | -43,-3,10  | 0.354 | 0.797 | 0.334 | 0.650 | 5.929 | 0.543 |
| 56 | 3 | 47,4,3     | 0.437 | 0.867 | 0.340 | 0.680 | 7.848 | 0.816 |
| 57 | 3 | -33,0,6    | 0.349 | 0.804 | 0.333 | 0.678 | 6.008 | 0.553 |
| 58 | 3 | -49,5,0    | 0.465 | 0.872 | 0.349 | 0.808 | 8.560 | 0.808 |
| 59 | 3 | -6,13,36   | 0.333 | 0.795 | 0.338 | 0.708 | 6.216 | 0.522 |
| 60 | 3 | 34,6,5     | 0.331 | 0.797 | 0.329 | 0.511 | 5.684 | 0.565 |
| 61 | 4 | 30,-29,14  | 0.268 | 0.611 | 0.328 | 0.551 | 4.303 | 0.196 |
| 62 | 4 | 62,-36,21  | 0.455 | 0.858 | 0.342 | 0.672 | 8.087 | 0.776 |
| 63 | 4 | 55,-19,10  | 0.438 | 0.868 | 0.341 | 0.683 | 7.720 | 0.666 |
| 64 | 4 | -37,-35,16 | 0.351 | 0.831 | 0.330 | 0.562 | 5.938 | 0.490 |
| 65 | 4 | -58,-27,13 | 0.390 | 0.870 | 0.340 | 0.668 | 6.948 | 0.736 |
| 66 | 4 | -47,-28,5  | 0.352 | 0.814 | 0.330 | 0.646 | 5.841 | 0.504 |
| 67 | 4 | 41,-26,21  | 0.438 | 0.857 | 0.340 | 0.740 | 7.509 | 0.697 |
| 68 | 4 | -48,-36,24 | 0.319 | 0.784 | 0.331 | 0.580 | 5.200 | 0.455 |
| 69 | 4 | -51,-24,22 | 0.346 | 0.788 | 0.334 | 0.610 | 5.808 | 0.452 |
| 70 | 4 | -53,-12,12 | 0.406 | 0.844 | 0.339 | 0.704 | 7.292 | 0.660 |
| 71 | 4 | 53,-9,16   | 0.404 | 0.860 | 0.340 | 0.699 | 7.101 | 0.663 |
| 72 | 4 | 56,-21,30  | 0.417 | 0.839 | 0.338 | 0.699 | 7.068 | 0.627 |
| 73 | 4 | -29,-29,12 | 0.301 | 0.746 | 0.329 | 0.549 | 5.112 | 0.303 |
| 74 | 5 | -39,-75,22 | 0.359 | 0.822 | 0.345 | 0.794 | 6.581 | 0.577 |
| 75 | 5 | 5,60,3     | 0.444 | 0.885 | 0.354 | 0.800 | 7.402 | 0.626 |

|     |    |             |       |       |       |       |       |       |
|-----|----|-------------|-------|-------|-------|-------|-------|-------|
| 76  | 5  | 8,42,-9     | 0.334 | 0.821 | 0.337 | 0.628 | 5.850 | 0.478 |
| 77  | 5  | -12,-41,1   | 0.354 | 0.808 | 0.328 | 0.450 | 5.896 | 0.535 |
| 78  | 5  | -17,57,-3   | 0.358 | 0.829 | 0.341 | 0.658 | 6.354 | 0.588 |
| 79  | 5  | -44,-61,18  | 0.385 | 0.855 | 0.345 | 0.774 | 6.539 | 0.596 |
| 80  | 5  | 41,-73,26   | 0.428 | 0.872 | 0.345 | 0.761 | 7.820 | 0.681 |
| 81  | 5  | -41,9,-30   | 0.317 | 0.745 | 0.330 | 0.632 | 5.382 | 0.390 |
| 82  | 5  | 44,12,-24   | 0.338 | 0.823 | 0.326 | 0.533 | 5.334 | 0.457 |
| 83  | 5  | -65,-24,-15 | 0.142 | 0.188 | 0.320 | 0.360 | 2.182 | 0.053 |
| 84  | -1 | -55,-27,-14 | 0.270 | 0.714 | 0.325 | 0.516 | 4.381 | 0.197 |
| 85  | -1 | 26,12,-12   | 0.356 | 0.818 | 0.331 | 0.557 | 6.215 | 0.599 |
| 86  | 5  | -43,-65,31  | 0.432 | 0.857 | 0.350 | 0.809 | 7.600 | 0.726 |
| 87  | 5  | -38,-75,39  | 0.451 | 0.825 | 0.351 | 0.788 | 7.568 | 0.629 |
| 88  | 5  | -7,-56,25   | 0.386 | 0.831 | 0.350 | 0.813 | 6.633 | 0.614 |
| 89  | 5  | 5,-60,33    | 0.435 | 0.870 | 0.349 | 0.803 | 7.439 | 0.710 |
| 90  | 5  | -11,-57,14  | 0.373 | 0.768 | 0.341 | 0.720 | 6.532 | 0.563 |
| 91  | 5  | -3,-50,12   | 0.415 | 0.834 | 0.344 | 0.742 | 6.911 | 0.634 |
| 92  | 5  | 7,-50,29    | 0.389 | 0.834 | 0.345 | 0.786 | 6.412 | 0.528 |
| 93  | 5  | 14,-64,24   | 0.367 | 0.794 | 0.340 | 0.662 | 6.653 | 0.587 |
| 94  | 5  | -3,-39,42   | 0.386 | 0.832 | 0.344 | 0.773 | 6.795 | 0.662 |
| 95  | 5  | 10,-55,16   | 0.348 | 0.744 | 0.339 | 0.717 | 6.074 | 0.530 |
| 96  | 5  | 49,-61,34   | 0.491 | 0.875 | 0.348 | 0.788 | 8.358 | 0.793 |
| 97  | 5  | 21,27,50    | 0.360 | 0.803 | 0.346 | 0.750 | 6.016 | 0.526 |
| 98  | 5  | -11,33,54   | 0.416 | 0.838 | 0.342 | 0.713 | 6.703 | 0.599 |
| 99  | 5  | -17,23,54   | 0.382 | 0.829 | 0.347 | 0.750 | 6.401 | 0.601 |
| 100 | 5  | -35,15,51   | 0.363 | 0.783 | 0.342 | 0.765 | 6.127 | 0.570 |
| 101 | 5  | 20,33,42    | 0.324 | 0.767 | 0.340 | 0.708 | 5.402 | 0.405 |
| 102 | 5  | 11,48,42    | 0.393 | 0.831 | 0.341 | 0.745 | 6.527 | 0.628 |
| 103 | 5  | -11,48,42   | 0.420 | 0.845 | 0.345 | 0.748 | 7.057 | 0.714 |
| 104 | 5  | -20,39,42   | 0.363 | 0.799 | 0.343 | 0.768 | 6.299 | 0.599 |
| 105 | 5  | 5,48,21     | 0.503 | 0.880 | 0.356 | 0.828 | 9.004 | 0.817 |
| 106 | 5  | 5,57,27     | 0.492 | 0.874 | 0.347 | 0.759 | 8.524 | 0.707 |
| 107 | 5  | -7,45,4     | 0.457 | 0.855 | 0.353 | 0.823 | 8.273 | 0.725 |
| 108 | 5  | 8,48,9      | 0.428 | 0.856 | 0.350 | 0.819 | 7.402 | 0.755 |
| 109 | 5  | -3,39,-4    | 0.489 | 0.883 | 0.354 | 0.818 | 8.892 | 0.808 |
| 110 | 5  | 7,37,0      | 0.373 | 0.830 | 0.344 | 0.742 | 6.683 | 0.622 |
| 111 | 5  | -11,39,12   | 0.249 | 0.581 | 0.328 | 0.474 | 4.071 | 0.201 |
| 112 | 5  | -3,32,39    | 0.401 | 0.830 | 0.349 | 0.770 | 7.184 | 0.732 |
| 113 | 5  | -3,36,20    | 0.367 | 0.808 | 0.343 | 0.756 | 6.782 | 0.676 |
| 114 | 5  | -20,57,24   | 0.451 | 0.853 | 0.354 | 0.814 | 8.456 | 0.768 |
| 115 | 5  | -8,42,27    | 0.285 | 0.708 | 0.334 | 0.619 | 4.836 | 0.263 |
| 116 | 5  | 62,-15,-15  | 0.266 | 0.668 | 0.328 | 0.512 | 4.522 | 0.256 |
| 117 | 5  | -53,-15,-9  | 0.312 | 0.775 | 0.339 | 0.680 | 5.427 | 0.421 |
| 118 | 5  | -55,-31,-4  | 0.357 | 0.829 | 0.334 | 0.625 | 5.848 | 0.533 |

|     |    |             |       |       |       |       |        |       |
|-----|----|-------------|-------|-------|-------|-------|--------|-------|
| 119 | 5  | 62,-33,-6   | 0.380 | 0.849 | 0.336 | 0.621 | 6.309  | 0.563 |
| 120 | 5  | -65,-42,-6  | 0.210 | 0.488 | 0.321 | 0.423 | 3.204  | 0.090 |
| 121 | 5  | 11,24,60    | 0.384 | 0.833 | 0.344 | 0.728 | 6.690  | 0.600 |
| 122 | 5  | 11,30,24    | 0.266 | 0.674 | 0.330 | 0.500 | 4.610  | 0.215 |
| 123 | 5  | 50,-6,-12   | 0.325 | 0.815 | 0.331 | 0.663 | 5.500  | 0.439 |
| 124 | 5  | -25,-41,-8  | 0.379 | 0.848 | 0.327 | 0.502 | 6.227  | 0.593 |
| 125 | 5  | 26,-39,-11  | 0.380 | 0.835 | 0.329 | 0.540 | 6.405  | 0.616 |
| 126 | 5  | -32,-39,-15 | 0.322 | 0.784 | 0.330 | 0.538 | 5.564  | 0.478 |
| 127 | 5  | 28,-76,-31  | 0.301 | 0.760 | 0.335 | 0.730 | 5.156  | 0.375 |
| 128 | 5  | 50,3,-24    | 0.326 | 0.776 | 0.328 | 0.533 | 5.473  | 0.446 |
| 129 | 5  | -50,0,-24   | 0.290 | 0.749 | 0.332 | 0.563 | 5.024  | 0.314 |
| 130 | 5  | 44,-52,28   | 0.327 | 0.706 | 0.337 | 0.640 | 5.392  | 0.422 |
| 131 | 5  | -47,-43,0   | 0.318 | 0.770 | 0.322 | 0.376 | 4.968  | 0.333 |
| 132 | -1 | -29,15,-15  | 0.364 | 0.829 | 0.338 | 0.694 | 6.594  | 0.654 |
| 133 | -1 | -3,-37,30   | 0.371 | 0.831 | 0.344 | 0.724 | 6.371  | 0.573 |
| 134 | -1 | -7,-72,38   | 0.472 | 0.849 | 0.354 | 0.791 | 8.537  | 0.768 |
| 135 | -1 | 10,-67,39   | 0.335 | 0.765 | 0.340 | 0.739 | 5.745  | 0.497 |
| 136 | -1 | 3,-50,48    | 0.409 | 0.849 | 0.347 | 0.745 | 7.471  | 0.700 |
| 137 | 5  | -44,27,-9   | 0.365 | 0.775 | 0.338 | 0.729 | 6.342  | 0.674 |
| 138 | 11 | -11,6,66    | 0.326 | 0.759 | 0.335 | 0.653 | 5.602  | 0.384 |
| 139 | 5  | 47,30,-6    | 0.376 | 0.840 | 0.339 | 0.671 | 6.900  | 0.712 |
| 140 | -1 | 8,-90,-9    | 0.502 | 0.867 | 0.346 | 0.819 | 9.302  | 0.824 |
| 141 | -1 | 17,-90,-15  | 0.661 | 0.868 | 0.342 | 0.716 | 11.626 | 0.809 |
| 142 | -1 | -11,-93,-15 | 0.474 | 0.876 | 0.336 | 0.666 | 7.771  | 0.702 |
| 143 | 7  | 17,-48,-9   | 0.373 | 0.854 | 0.325 | 0.364 | 6.170  | 0.577 |
| 144 | 7  | 38,-73,13   | 0.338 | 0.780 | 0.338 | 0.693 | 5.945  | 0.524 |
| 145 | 7  | 8,-72,9     | 0.459 | 0.871 | 0.341 | 0.716 | 8.566  | 0.767 |
| 146 | 7  | -8,-80,5    | 0.390 | 0.845 | 0.337 | 0.668 | 7.219  | 0.611 |
| 147 | 7  | -27,-79,16  | 0.322 | 0.713 | 0.339 | 0.695 | 5.827  | 0.520 |
| 148 | 7  | 19,-66,1    | 0.300 | 0.716 | 0.330 | 0.592 | 5.266  | 0.412 |
| 149 | 7  | -23,-90,15  | 0.413 | 0.855 | 0.346 | 0.798 | 7.841  | 0.721 |
| 150 | 7  | 26,-60,-9   | 0.372 | 0.826 | 0.334 | 0.624 | 6.510  | 0.635 |
| 151 | 7  | -14,-72,-9  | 0.332 | 0.774 | 0.338 | 0.711 | 5.812  | 0.483 |
| 152 | 7  | -17,-68,3   | 0.302 | 0.759 | 0.328 | 0.517 | 5.196  | 0.382 |
| 153 | 7  | 41,-78,-12  | 0.406 | 0.834 | 0.341 | 0.710 | 7.358  | 0.704 |
| 154 | 7  | -44,-75,-12 | 0.309 | 0.774 | 0.339 | 0.738 | 5.541  | 0.588 |
| 155 | 7  | -14,-90,27  | 0.420 | 0.836 | 0.350 | 0.794 | 7.900  | 0.664 |
| 156 | 7  | 14,-87,33   | 0.459 | 0.845 | 0.355 | 0.807 | 8.655  | 0.772 |
| 157 | 7  | 27,-77,23   | 0.324 | 0.732 | 0.337 | 0.685 | 6.202  | 0.533 |
| 158 | 7  | 19,-85,-4   | 0.256 | 0.668 | 0.333 | 0.483 | 4.794  | 0.228 |
| 159 | 7  | 14,-77,28   | 0.375 | 0.809 | 0.345 | 0.709 | 7.149  | 0.690 |
| 160 | 7  | -15,-53,-2  | 0.352 | 0.814 | 0.328 | 0.476 | 6.116  | 0.575 |
| 161 | 7  | 40,-66,-8   | 0.346 | 0.806 | 0.332 | 0.600 | 6.034  | 0.530 |

|     |    |             |       |       |       |       |       |       |
|-----|----|-------------|-------|-------|-------|-------|-------|-------|
| 162 | 7  | 23,-87,21   | 0.375 | 0.814 | 0.343 | 0.703 | 7.106 | 0.634 |
| 163 | 7  | 5,-72,21    | 0.469 | 0.868 | 0.347 | 0.742 | 8.706 | 0.800 |
| 164 | 7  | -40,-73,-2  | 0.311 | 0.743 | 0.334 | 0.582 | 5.469 | 0.321 |
| 165 | 7  | 25,-79,-16  | 0.407 | 0.859 | 0.341 | 0.746 | 7.142 | 0.641 |
| 166 | 7  | -16,-77,30  | 0.329 | 0.808 | 0.339 | 0.693 | 6.380 | 0.552 |
| 167 | 7  | -3,-81,18   | 0.434 | 0.875 | 0.345 | 0.782 | 7.963 | 0.770 |
| 168 | 7  | -38,-87,-9  | 0.342 | 0.823 | 0.341 | 0.689 | 6.218 | 0.643 |
| 169 | 7  | 35,-84,11   | 0.407 | 0.861 | 0.344 | 0.730 | 7.374 | 0.653 |
| 170 | 7  | 6,-81,4     | 0.421 | 0.873 | 0.342 | 0.734 | 8.103 | 0.758 |
| 171 | 7  | -25,-89,0   | 0.351 | 0.799 | 0.339 | 0.671 | 6.196 | 0.549 |
| 172 | 7  | -31,-78,-15 | 0.371 | 0.819 | 0.340 | 0.673 | 6.669 | 0.659 |
| 173 | 7  | 35,-81,0    | 0.343 | 0.811 | 0.334 | 0.609 | 5.999 | 0.497 |
| 174 | 8  | -43,-2,45   | 0.377 | 0.826 | 0.339 | 0.682 | 6.443 | 0.673 |
| 175 | 8  | 45,19,30    | 0.433 | 0.864 | 0.345 | 0.747 | 7.354 | 0.729 |
| 176 | 8  | -45,7,24    | 0.425 | 0.855 | 0.341 | 0.724 | 7.216 | 0.711 |
| 177 | 8  | -51,-50,39  | 0.373 | 0.815 | 0.344 | 0.740 | 6.552 | 0.688 |
| 178 | 8  | -23,6,63    | 0.340 | 0.789 | 0.337 | 0.642 | 5.669 | 0.506 |
| 179 | 8  | 56,-54,-12  | 0.367 | 0.850 | 0.339 | 0.726 | 6.469 | 0.598 |
| 180 | 8  | 23,39,-9    | 0.341 | 0.825 | 0.338 | 0.703 | 6.083 | 0.518 |
| 181 | 8  | 32,48,-6    | 0.381 | 0.858 | 0.338 | 0.679 | 6.508 | 0.684 |
| 182 | -1 | -20,36,-15  | 0.310 | 0.726 | 0.328 | 0.494 | 4.948 | 0.496 |
| 183 | -1 | -16,-75,-25 | 0.309 | 0.775 | 0.337 | 0.680 | 5.426 | 0.557 |
| 184 | -1 | 17,-79,-34  | 0.334 | 0.750 | 0.337 | 0.688 | 6.156 | 0.451 |
| 185 | -1 | 34,-67,-33  | 0.285 | 0.724 | 0.328 | 0.478 | 4.777 | 0.343 |
| 186 | 8  | 44,5,35     | 0.393 | 0.837 | 0.338 | 0.635 | 6.654 | 0.608 |
| 187 | 8  | -40,2,33    | 0.431 | 0.876 | 0.342 | 0.681 | 7.298 | 0.730 |
| 188 | 8  | -41,33,24   | 0.425 | 0.845 | 0.347 | 0.772 | 7.508 | 0.697 |
| 189 | 8  | 36,37,20    | 0.345 | 0.790 | 0.336 | 0.632 | 5.757 | 0.527 |
| 190 | 8  | 46,-45,44   | 0.454 | 0.866 | 0.348 | 0.746 | 7.781 | 0.775 |
| 191 | 8  | -28,-59,44  | 0.408 | 0.851 | 0.348 | 0.774 | 7.220 | 0.719 |
| 192 | 8  | 41,-55,45   | 0.548 | 0.879 | 0.353 | 0.775 | 9.654 | 0.840 |
| 193 | 8  | 29,9,57     | 0.409 | 0.843 | 0.347 | 0.741 | 7.123 | 0.689 |
| 194 | 8  | 35,-66,38   | 0.440 | 0.863 | 0.348 | 0.750 | 7.733 | 0.703 |
| 195 | 8  | -41,-56,41  | 0.408 | 0.838 | 0.345 | 0.762 | 7.400 | 0.717 |
| 196 | 8  | 37,13,42    | 0.345 | 0.801 | 0.337 | 0.652 | 5.675 | 0.503 |
| 197 | 8  | -33,49,9    | 0.440 | 0.857 | 0.351 | 0.736 | 7.750 | 0.740 |
| 198 | 8  | -40,40,2    | 0.427 | 0.851 | 0.346 | 0.731 | 7.554 | 0.738 |
| 199 | 8  | 31,-55,42   | 0.373 | 0.825 | 0.343 | 0.719 | 6.414 | 0.604 |
| 200 | 8  | 41,43,4     | 0.479 | 0.878 | 0.352 | 0.773 | 8.179 | 0.814 |
| 201 | 8  | -41,20,31   | 0.386 | 0.839 | 0.339 | 0.647 | 6.543 | 0.638 |
| 202 | 8  | -4,21,46    | 0.339 | 0.773 | 0.339 | 0.739 | 5.854 | 0.563 |
| 203 | 9  | 9,-41,48    | 0.316 | 0.796 | 0.332 | 0.536 | 5.467 | 0.340 |
| 204 | 9  | 52,-47,36   | 0.465 | 0.880 | 0.345 | 0.737 | 8.108 | 0.765 |

|     |    |             |       |       |       |       |       |       |
|-----|----|-------------|-------|-------|-------|-------|-------|-------|
| 205 | 9  | 39,-5,48    | 0.341 | 0.800 | 0.334 | 0.615 | 5.684 | 0.464 |
| 206 | 9  | 29,27,30    | 0.247 | 0.595 | 0.325 | 0.514 | 4.090 | 0.205 |
| 207 | 9  | 45,17,14    | 0.352 | 0.793 | 0.330 | 0.605 | 5.680 | 0.517 |
| 208 | 9  | -34,16,3    | 0.429 | 0.855 | 0.340 | 0.681 | 7.708 | 0.777 |
| 209 | 9  | 34,17,7     | 0.369 | 0.822 | 0.335 | 0.582 | 6.550 | 0.628 |
| 210 | 9  | 35,27,3     | 0.357 | 0.802 | 0.337 | 0.733 | 6.181 | 0.551 |
| 211 | 9  | 32,12,-3    | 0.360 | 0.835 | 0.332 | 0.625 | 6.348 | 0.650 |
| 212 | 9  | -11,21,27   | 0.206 | 0.466 | 0.320 | 0.376 | 3.406 | 0.049 |
| 213 | 9  | -2,10,45    | 0.422 | 0.839 | 0.345 | 0.798 | 7.536 | 0.731 |
| 214 | 9  | -27,46,25   | 0.360 | 0.801 | 0.348 | 0.802 | 6.510 | 0.694 |
| 215 | 9  | -1,25,30    | 0.363 | 0.795 | 0.346 | 0.746 | 6.735 | 0.624 |
| 216 | 9  | 4,18,39     | 0.397 | 0.838 | 0.351 | 0.792 | 7.224 | 0.760 |
| 217 | 9  | 9,17,30     | 0.254 | 0.617 | 0.326 | 0.405 | 4.494 | 0.115 |
| 218 | 9  | 29,49,20    | 0.407 | 0.836 | 0.350 | 0.775 | 7.168 | 0.710 |
| 219 | 9  | 24,43,31    | 0.328 | 0.816 | 0.343 | 0.731 | 5.698 | 0.425 |
| 220 | 9  | -38,45,21   | 0.422 | 0.846 | 0.348 | 0.672 | 7.823 | 0.751 |
| 221 | -1 | 1,-27,30    | 0.402 | 0.837 | 0.347 | 0.757 | 6.822 | 0.702 |
| 222 | 10 | 6,-26,1     | 0.372 | 0.847 | 0.320 | 0.419 | 6.106 | 0.512 |
| 223 | 10 | -2,-16,13   | 0.391 | 0.837 | 0.339 | 0.719 | 6.930 | 0.707 |
| 224 | 10 | -10,-21,8   | 0.302 | 0.730 | 0.330 | 0.525 | 5.532 | 0.426 |
| 225 | 10 | 11,-20,9    | 0.323 | 0.800 | 0.337 | 0.644 | 5.908 | 0.439 |
| 226 | 10 | -5,-30,-3   | 0.348 | 0.826 | 0.320 | 0.419 | 5.752 | 0.517 |
| 227 | 10 | -21,4,-2    | 0.355 | 0.829 | 0.335 | 0.619 | 6.474 | 0.603 |
| 228 | 10 | -15,0,10    | 0.271 | 0.703 | 0.328 | 0.510 | 4.697 | 0.233 |
| 229 | 10 | 29,-17,4    | 0.328 | 0.788 | 0.327 | 0.522 | 5.678 | 0.465 |
| 230 | 10 | 22,6,5      | 0.340 | 0.835 | 0.335 | 0.627 | 6.133 | 0.565 |
| 231 | 10 | 27,-3,7     | 0.334 | 0.807 | 0.328 | 0.520 | 5.666 | 0.478 |
| 232 | 10 | -30,-14,1   | 0.308 | 0.763 | 0.328 | 0.517 | 5.408 | 0.371 |
| 233 | 10 | 14,1,10     | 0.312 | 0.789 | 0.336 | 0.660 | 5.609 | 0.388 |
| 234 | 10 | 8,-7,8      | 0.313 | 0.773 | 0.332 | 0.534 | 5.474 | 0.377 |
| 235 | 11 | 51,-45,22   | 0.389 | 0.849 | 0.339 | 0.726 | 6.739 | 0.611 |
| 236 | 11 | -54,-51,8   | 0.333 | 0.797 | 0.336 | 0.582 | 5.670 | 0.496 |
| 237 | 11 | -53,-41,12  | 0.310 | 0.786 | 0.335 | 0.668 | 5.224 | 0.367 |
| 238 | 11 | 49,-35,9    | 0.355 | 0.835 | 0.331 | 0.603 | 5.684 | 0.429 |
| 239 | 11 | 49,-31,-2   | 0.384 | 0.843 | 0.332 | 0.531 | 6.358 | 0.607 |
| 240 | 11 | 53,-48,12   | 0.427 | 0.844 | 0.338 | 0.682 | 7.282 | 0.698 |
| 241 | 11 | 50,27,6     | 0.388 | 0.846 | 0.343 | 0.749 | 6.723 | 0.749 |
| 242 | 11 | -47,21,2    | 0.498 | 0.873 | 0.349 | 0.789 | 8.906 | 0.824 |
| 243 | -1 | -15,-65,-20 | 0.314 | 0.794 | 0.330 | 0.584 | 5.778 | 0.520 |
| 244 | -1 | -30,-55,-25 | 0.301 | 0.742 | 0.333 | 0.618 | 5.244 | 0.450 |
| 245 | -1 | 22,-58,-22  | 0.290 | 0.739 | 0.325 | 0.529 | 5.093 | 0.349 |
| 246 | -1 | 1,-62,-18   | 0.284 | 0.779 | 0.324 | 0.476 | 5.001 | 0.317 |
| 247 | -1 | 32,-15,-30  | 0.217 | 0.504 | 0.323 | 0.448 | 3.725 | 0.020 |

|            |    |             |       |       |       |       |       |       |
|------------|----|-------------|-------|-------|-------|-------|-------|-------|
| <b>248</b> | -1 | -29,-12,-33 | 0.233 | 0.576 | 0.327 | 0.610 | 4.308 | 0.125 |
| <b>249</b> | -1 | 47,-6,-33   | 0.249 | 0.623 | 0.325 | 0.493 | 4.434 | 0.187 |
| <b>250</b> | -1 | -47,-9,-36  | 0.190 | 0.374 | 0.322 | 0.414 | 3.200 | 0.098 |
| <b>251</b> | 12 | 8,-63,57    | 0.551 | 0.849 | 0.345 | 0.801 | 9.426 | 0.820 |
| <b>252</b> | 12 | -50,-63,3   | 0.318 | 0.789 | 0.339 | 0.711 | 5.549 | 0.555 |
| <b>253</b> | -1 | -44,-51,-21 | 0.304 | 0.742 | 0.337 | 0.599 | 5.441 | 0.567 |
| <b>254</b> | -1 | 44,-48,-15  | 0.343 | 0.831 | 0.333 | 0.614 | 5.965 | 0.655 |
| <b>255</b> | 1  | 44,-33,48   | 0.429 | 0.870 | 0.341 | 0.711 | 7.275 | 0.648 |
| <b>256</b> | 12 | 20,-66,45   | 0.376 | 0.843 | 0.345 | 0.766 | 6.967 | 0.572 |
| <b>257</b> | 12 | 44,-60,4    | 0.326 | 0.743 | 0.332 | 0.586 | 5.675 | 0.479 |
| <b>258</b> | 12 | 23,-60,57   | 0.515 | 0.869 | 0.345 | 0.711 | 9.158 | 0.712 |
| <b>259</b> | 12 | -32,-48,44  | 0.301 | 0.776 | 0.333 | 0.615 | 5.181 | 0.465 |
| <b>260</b> | 12 | -26,-71,33  | 0.302 | 0.728 | 0.337 | 0.633 | 5.251 | 0.457 |
| <b>261</b> | 12 | -32,-5,53   | 0.350 | 0.817 | 0.334 | 0.668 | 5.870 | 0.538 |
| <b>262</b> | 12 | -40,-60,-10 | 0.321 | 0.791 | 0.328 | 0.515 | 5.357 | 0.449 |
| <b>263</b> | 12 | -17,-60,60  | 0.422 | 0.828 | 0.343 | 0.728 | 7.081 | 0.674 |
| <b>264</b> | 12 | 26,-9,54    | 0.354 | 0.832 | 0.336 | 0.683 | 6.210 | 0.534 |
